1 **Analysis of IL-4 Levels, IL-1 $\alpha$ , Cortisol Hormone, and Blood Cell Number**  
2 **in Parkinson's Disease Patients Undergoing Dance-based Movement**  
3 **Therapy: A Preliminary Study**

4 Ethical committee of the Federal University of Pará (CEP: 3.965.311/ CAAE:  
5 27811119.4.0000.0018) and the Brazilian Registry of Clinical Trials (ReBEC RBR-  
6 3bhbrb5, UTN code: U1111-1275-6679)

7 Karen Adriana Pastana Marques<sup>1</sup>, Gabriel Mesquita da Conceição Bahia<sup>1</sup>, Juliana dos  
8 Santos Duarte<sup>1</sup>, Denise da Silva Pinto<sup>2</sup>, Arnaldo Jorge Martins Filho<sup>3</sup>, Evander de Jesus  
9 Oliveira Batista<sup>4</sup>, Anderson Manoel Herculano Oliveira da Silva<sup>5</sup>, Karen Renata Herculano  
10 Matos Oliveira<sup>5</sup>, Lane Viana Krejcová<sup>6</sup>, and Carlomagno Pacheco Bahia<sup>1\*</sup>.

11  
12 **Affiliations**

13 <sup>1</sup>Neuroplasticity Lab, Institute of Health Sciences, Federal University of Pará, Belém,  
14 Pará, Brazil.

15 <sup>2</sup>Functional Rehab Laboratory, Institute of Health Sciences, Federal University of Pará,  
16 Belém, Pará, Brazil.

17 <sup>3</sup>Evandro Chagas Institute, Belém, Pará, Brazil.

18 <sup>4</sup>Protozoology Laboratory, Tropical Medicine Nucleus, Federal University of Pará, Belém,  
19 Pará, Brazil.

20 <sup>5</sup>Experimental Neuropharmacology Lab, Institute of Biologic Science, Federal University  
21 of Pará, Belém, Pará, Brazil.

22 <sup>6</sup>College of Dance, Institute of Art Sciences, Federal University of Pará, Belém, Pará,  
23 Brazil.

24  
25 \* **Corresponding author:** Carlomagno Pacheco Bahia. Email address:  
26 [carlomagnobahia@gmail.com](mailto:carlomagnobahia@gmail.com) [carlomagno@ufpa.br](mailto:carlomagno@ufpa.br) (CPB)

27

## 28 **Abstract**

29 **Introduction:** The interplay between neuroinflammation and Parkinson's disease (PD) is  
30 still unclear, although several studies suggest that neuroinflammation plays an  
31 important role in the pathophysiological pathways of neurodegenerative disorders.  
32 Dance-based movement therapy has been studied as an adjuvant treatment for PD  
33 symptoms by modulating some inflammatory interleukins and improving the overall  
34 effect of pharmacological treatments.

35 **Objective:** To evaluate the levels of Interleukin 4, Interleukin 1 $\alpha$ , cortisol hormone, and  
36 blood cell total numbers in PD subjects undergoing dance-based movement therapy.

37 **Methods:** Twenty-five participants were selected for this study. Seventeen subjects  
38 diagnosed with PD were divided into two groups: PD group (n=8) and PD+dance group  
39 (n=9). Another group was composed of age-matched healthy controls (n=8). The dance-  
40 based movement therapy was performed twice a week for 50-60 minutes/session over  
41 six months.

42 **Results:** The serum IL-4 levels were significantly lower in the PD group when compared  
43 to the healthy group, while the PD+Dance group showed similar levels to the healthy  
44 group. The levels of IL-1 $\alpha$ , cortisol, and blood cell count showed no statistical differences  
45 between groups.

46 **Conclusion:** Our results suggest that regular practice of dance-based movement therapy  
47 may induce a neuroprotective effect by modulating the levels of IL-4 in people with PD  
48 similarly to healthy participants.

49

50 **Keywords:** Parkinson's Disease; Dance-based Movement Therapy; Interleukins; Cortisol;  
51 Blood Cells.

52

53 **Trial registration:** The study was registered in the Brazilian registry of clinical trials: RBR-  
54 3bhbrb5.

55

56 **Short title:** Dance-based movement therapy as adjuvant treatment for Parkinson's  
57 disease

58

## 59 Introduction

60 The interplay between inflammation and Parkinson’s disease (PD) is still unclear,  
61 although inflammation plays an important role in neurodegenerative disorders[1] and  
62 may help promote neuronal death and involve blood cell abnormalities[2].

63 The effects of physical exercise on motor and non-motor symptoms in people  
64 with PD effectively modulate the inflammatory process[3], promoting neuronal survival  
65 by increasing the production of neurotrophic factors, releasing neurotransmitters, and  
66 improving neurogenesis, angiogenesis, modulating inflammatory cytokines, and cortisol  
67 hormone expression[3,4].

68 Thus, therapy based on dance movements may be a physical activity alternative  
69 to improve PD treatment [5], once dance involves motor skills such as motion planning,  
70 rhythm, motor memory, proprioception, imitation[5–7], emotional aspects, and  
71 visuospatial information, in addition to increasing body balance, integrating brain areas,  
72 decreasing cortisol hormone, and improving neuroplasticity [5,6,8,9].

73 To this date, no study has analyzed the serum levels of inflammatory cytokines,  
74 the stress hormone (cortisol), and the blood cell number in people with PD undergoing  
75 dance-based movement therapy. Therefore, the present study evaluated the serum  
76 levels of Interleukin 4 (IL-4), Interleukin 1 $\alpha$  (IL-1 $\alpha$ ), cortisol hormone, and total blood cell  
77 numbers in people with Parkinson's disease undergoing physical activity based on dance  
78 movements.

79

## 80 Methods

### 81 Study design and Participants

82 We performed a longitudinal study aiming to analyze the effects of physical  
83 activity based on dance movements using the “Baila Parkinson” method as a  
84 complementary therapy for Parkinson’s disease [10].

85 We submitted this study to the ethical committee of the Federal University of  
86 Pará (CEP: 3.965.311/ CAAE: 27811119.4.0000.0018) and registered it in the Brazilian  
87 Registry of Clinical Trials (ReBEC RBR-3bhbrb5, UTN code: U1111-1275-6679). The  
88 research was developed from July to December 2019, the participants were recruited  
89 through social media announcements, the follow-up was until march 2020, and the  
90 inclusion criteria were: 1) a diagnosis of PD according to the UK Parkinson’s Disease  
91 Society Brain Bank (UKPDSBB); 2) Hoehn and Yahr stages I to III under pharmacological  
92 treatment for at least 3 years; and 3) the ability to walk independently. Exclusion criteria:  
93 1) presence of other neurologic or neuropsychiatric conditions; 2) comorbid  
94 inflammatory disease; or 3) severe cardiopulmonary disease. This study was conducted  
95 in accordance with the Declaration of the World Medical Association and all participants  
96 provided written informed consent.

97 The study included 25 subjects. Seventeen (n=17) subjects with Parkinson's  
98 disease, and eight (n=8) healthy controls (Healthy Group - HG) were selected.  
99 Demographic and clinical parameters were documented. Among the subjects with PD,  
100 eight received their PD medical treatment as usual (PD Group, n=8), whereas the other  
101 nine subjects with PD received medical treatment associated to dance therapy  
102 (PD+Dance, n=9). All PD subjects were submitted to evaluation of disease progression  
103 through the Unified Parkinson Disease Rating Scale (UPDRS), and fulfilled UKPDSBB  
104 clinical criteria for idiopathic PD (H&Y Scale  $1,88 \pm 0,33$ ; UPDRS III  $30,55 \pm 13,60$ ; UPDRS  
105 Total  $48,77 \pm 19,63$ ).

## 106 **Intervention: Dance-based movement therapy**

107           The dance-based movement therapy was performed twice a week, 50-60  
108 minutes per session for six months following a protocol based on the “Baila Parkinson”  
109 method [10].

110

## 111 **Data Collection and Statistical Analysis**

112           We collected the peripheral blood of all participants (10 mL through peripheral  
113 vein puncture; at 8-9 am after 8h of fasting) and centrifuged it at 3500 g for 10 min. The  
114 serum was removed and stored at -80 °C (Sanyo VIP Plus -80°C Freezer) until analysis.

115           The levels of IL-4, IL-1 $\alpha$ , and cortisol were measured using the Enzyme-Linked  
116 Immunosorbent Assay - ELISA (Invitrogen®) method. The blood cell number was  
117 calculated using impedance and colorimetric measurements (Medical Laboratory  
118 Equipment Blood Test CBC). The results were analyzed using GraphPad Prism® 8.0  
119 Software. We tested the data for normality (Kolmogorov-Smirnov) and homogeneity  
120 (Levine test). The data were analyzed using a one-way analysis of variance (ANOVA)  
121 corrected by the Tukey intergroup post-test or Kruskal-Wallis test for non-parametric  
122 data. Statistical significance was  $p < 0.05$ , and all data are presented as mean  $\pm$  standard  
123 deviation (M $\pm$ SD).

124

## 125 **Results**

126           The present study aimed to the serum levels of Interleukin 4 (IL-4), Interleukin  
127 1 $\alpha$  (IL-1 $\alpha$ ), cortisol hormone, and total blood cell numbers in people with Parkinson's

128 disease undergoing physical activity based on dance movements. Peripheral blood was  
129 collected once and IL-1 $\alpha$ , IL-4, cortisol levels and blood cell count were measured.

130 Twenty-five individuals enrolled in this study which eight were healthy and  
131 seventeen were with idiopathic PD. Nine individuals with idiopathic PD were selected to  
132 attend the therapeutic sessions (Fig 1). were selected to attend the therapeutic sessions  
133 (Fig 1). The demographic and clinical parameters of the three subjects' groups are shown  
134 in Table 1. There were no statistically significant differences in age or gender among the  
135 three groups.

136 >>> INSERT FIGURE 1 HERE

137

138 **Figure 1. Flowchart of the participant's recruitment for the study.**

139

140 **Table 1. Demographic and clinical features of the three groups.**

| Demographic and Clinical Features | Parkinson's Group with Dance (PD + Dance)<br>N=9 | Parkinson's Without Dance Group (PD)<br>N=8 | Healthy Group (HG)<br>N=8 |
|-----------------------------------|--------------------------------------------------|---------------------------------------------|---------------------------|
| Sex                               |                                                  |                                             |                           |
| Male                              | 4                                                | 4                                           | 3                         |
| Female                            | 5                                                | 4                                           | 5                         |
| Age (years)                       | 63,22 $\pm$ 9,40                                 | 67,25 $\pm$ 13,41                           | 59,12 $\pm$ 10,73         |
| Time since Diagnosis (Years)      | 4,55 $\pm$ 2,50                                  | 7,22 $\pm$ 5,80                             | -                         |
| H&Y Scale                         | 1,88 $\pm$ 0,33                                  | -                                           | -                         |
| UPDRS III                         | 30,55 $\pm$ 13,60                                | -                                           | -                         |
| UPDRS Total                       | 48,77 $\pm$ 19,63                                | -                                           | -                         |

141 UPDRS: Unified Parkinson's disease rating scale; H&Y Scale: Hoehn and Yahr Scale

## 142 **Pro and Anti-Inflammatory Cytokine Levels**

143 Serum blood levels of IL-4 in the PD group were significantly lower when  
144 compared to the healthy group (HG) while the PD+Dance group had IL-4 serum levels  
145 similar to the healthy group (HG:  $0.37 \pm 0.05$ ; PD:  $0.1280 \pm 0.02$ ; PD+Dance:  $0.2300 \pm 0.08$ ;  
146  $p=0,0079$ ). Regarding the levels of IL-1 $\alpha$ , there was no statistically significant difference  
147 between the groups, but the concentration of IL-1 $\alpha$  in the PD+Dance subjects was lower  
148 in relation to the PD group (HG:  $0.008 \pm 0.004$ ; PD group:  $0.022 \pm 0.02$ ; PD+Dance group:  
149  $0.01 \pm 0.01$ ;  $p=0,5051$ ), see Figure 2 A and B.

150

## 151 **Serum Cortisol Levels**

152 The serum blood level of cortisol hormone did not show statistically significant  
153 differences among the three groups analyzed (HG:  $12.40 \pm 3.86$ ; PD Group:  $11.57 \pm 5.31$ ;  
154 PD + Dance Group:  $10.32 \pm 2.75$ ; ANOVA  $p=0,56$ ), see Figure 2C.

155

156 >>> INSERT FIGURE 2 HERE

157

158 **Figure 2. The blood levels of IL-4, IL-1 $\alpha$ , and cortisol hormone analysis ( $\mu\text{g/dL}$ ).**  
159 Statistical difference assessed using one-way ANOVA test ( $p < 0.05$ ). A) Serum levels of  
160 interleukin 4: HG  $0.37 (\pm 0.05)$ ; PD  $0.1280 (\pm 0.02)$ ; PD + Dance  $0.2300 (\pm 0.08)$ ;  $p=0,0079$ .  
161 B) Serum levels of interleukin 1 $\alpha$ : HG  $0.008 (\pm 0.004)$ ; PD  $0.022 (\pm 0.02)$  and PD + Dance  
162  $0.01 (\pm 0.01)$ ;  $p=0,5051$ . C) Serum levels of cortisol: HG  $12.40 \pm 3.86$ ; PD Group  
163  $11.57 \pm 5.31$ ; PD + Dance Group  $10.32 \pm 2.75$ ; ANOVA  $p=0,56$ .

164

## 165 **Blood Cells Count**

166 The blood cell counts did not show statistical differences among the three groups  
 167 ( $p > 0.05$ ), see Table 2. However, two participants of the PD group that underwent dance-  
 168 based movement therapy (PD+Dance) had changes in red cell numbers, which may  
 169 indicate anemia and positive microcytosis (see Table 2). There was also one case with  
 170 erythrocytosis, one with hypochromic, another with thrombocytopenia, and the last  
 171 with atypical lymphocytes (Table S1).

172

173 **Table 2. Blood cell total numbers of the three groups (Data shown as mean  $\pm$  standard**  
 174 **deviation and one-way ANOVA test).**

| Blood Cell Count                         | Parkinson's Group with Dance (PD + Dance) N=9 | Parkinson's Without Dance Group (PD) N=8 | Healthy Group (HG) N=8  | p Value |
|------------------------------------------|-----------------------------------------------|------------------------------------------|-------------------------|---------|
| Red Blood Cells ( $10^6/\text{mm}^3$ )   | 4848888,88 $\pm$ 589246,22                    | 4878750 $\pm$ 817879,44                  | 5120000 $\pm$ 571564,26 | >0,05   |
| Hemoglobin (g/dl)                        | 14,28 $\pm$ 2,16                              | 14,60 $\pm$ 2,99                         | 14,77 $\pm$ 1,40        | >0,05   |
| Hematocrit (%)                           | 42,98 $\pm$ 6,24                              | 44,48 $\pm$ 8,67                         | 44,37 $\pm$ 4,13        | >0,05   |
| MCV ( $\mu\text{m}^3$ )                  | 88,56 $\pm$ 6,49                              | 90,92 $\pm$ 4,07                         | 87,03 $\pm$ 3,33        | >0,05   |
| MCH (pg)                                 | 29,42 $\pm$ 2,42                              | 29,81 $\pm$ 1,97                         | 28,96 $\pm$ 1,32        | >0,05   |
| MCHC (g/dl)                              | 33,21 $\pm$ 0,72                              | 32,78 $\pm$ 0,96                         | 33,77 $\pm$ 1,41        | >0,05   |
| White Blood Cells ( $10^3/\text{mm}^3$ ) | 6503,33 $\pm$ 1320,70                         | 7070 $\pm$ 1417,58                       | 6343,75 $\pm$ 1079,53   | >0,05   |
| Lymphocytes ( $\text{p}/\text{mm}^3$ )   | 2033,22 $\pm$ 646,03                          | 2173,25 $\pm$ 461,21                     | 2333,50 $\pm$ 567,02    | >0,05   |
| Monocytes ( $\text{p}/\text{mm}^3$ )     | 607204,23 $\pm$ 136,84                        | 400,50 $\pm$ 87,34                       | 438,75 $\pm$ 130,26     | >0,05   |
| Platelets ( $10^3/\text{mm}^3$ )         | 233111,11 $\pm$ 36285,13                      | 205250 $\pm$ 46092,29                    | 222875 $\pm$ 32148,92   | >0,05   |
| MPV ( $\mu\text{m}^3$ )                  | 8,48 $\pm$ 1,24                               | 10,93 $\pm$ 3,82                         | 8,81 $\pm$ 0,96         | >0,05   |

175 MCV: Mean Corpuscular Volume; MCH: Mean Corpuscular Hemoglobin; MCHC: Mean  
 176 Corpuscular Hemoglobin Concentration; MPV: Mean Platelet Volume.



177

## 178 **Discussion**

179           The participants in the PD group presented lower blood levels of IL-4 when  
180 compared to the HG group. The PD+Dance group had IL-4 concentration levels similar  
181 to those of the HG. This finding is relevant given the importance of IL-4 as a regulator  
182 for the inflammation process and its relationship with normal neuronal function which  
183 is damaged in neurodegenerative diseases[11]. Once physical activity may regulate  
184 different kinds of inflammatory cytokines, inhibiting neuroinflammatory responses via  
185 the upregulation of interleukins [12], our results suggest that dance-based movement  
186 therapy modulated neuroprotective mechanisms across the increasing IL-4 blood serum  
187 concentrations in the PD+Dance group (Figure 2A). However, it is necessary to evaluate  
188 the cellular and molecular mechanisms involved in the effects of regular therapy based  
189 on dance movements.

190           There was no difference among the three groups for IL-1 $\alpha$  serum blood levels.  
191 However, the IL-1 $\alpha$  blood serum levels of the PD+Dance group showed lower absolute  
192 values compared to the PD group (Figure 2B). Once the cell death is directly related to  
193 the regulation of IL-1 $\alpha$  processing and release, conceivably the neurodegenerative and  
194 chronic character of Parkinson's disease must be inducing cell death across the constant  
195 release of IL-1 $\alpha$ [1,12].

196           There was no difference among the three participants' groups regarding serum  
197 cortisol blood levels (Figure 2C). Although our results were not statistically significant,  
198 our work demonstrated that therapy based on dance movements was able to conserve  
199 cortisol levels in people with PD.

200           There was no statistically significant difference among the three experimental  
201 groups regarding the total number of blood cells. For the parameters of blood cell  
202 counting, see Table 2. However, the proportion of red blood cells and the platelet count  
203 of both the PD+Dance Group and the PD Group showed alterations in some cases, such  
204 as anemia and microcytosis (Table S1). The number of red blood cells, leukocytes, and  
205 hematocrit values were not affected by the experimental conditions and were similar to  
206 a previous study that supports the association between low hemoglobin levels and PD  
207 [13] [14].

208

## 209 **Conclusion**

210           Dance-based movement therapy reduced blood serum levels of IL-4, suggesting  
211 that its regular practice may modulate neuroprotective effective action to delay the  
212 progression of Parkinson's disease.

213

## 214 **Acknowledgment**

215 We thank the Health Science Institute and the Federal University of Para for their  
216 support and technical assistance.

217

218

## 219 References

- 220 1. Marogianni C, Sokratous M, Dardiotis E, Hadjigeorgiou GM, Bogdanos D,  
221 Xiromerisiou G. Neurodegeneration and inflammation—an interesting interplay  
222 in parkinson’s disease. *Int J Mol Sci.* 2020;21: 1–15. doi:10.3390/ijms21228421  
223
- 224 2. Bosman GJCGM. Disturbed red blood cell structure and function: An exploration  
225 of the role of red blood cells in neurodegeneration. *Front Med (Lausanne).*  
226 2018;5. doi:10.3389/fmed.2018.00198  
227
- 228 3. Almikhlaifi MA. The role of exercise in Parkinson’s Disease. *Neurosciences.*  
229 2023;28: 4–12. doi:10.17712/nsj.2023.1.20220105  
230
- 231 4. Ernst M, Folkerts AK, Gollan R, Lieker E, Caro-Valenzuela J, Adams A, et al.  
232 Physical exercise for people with Parkinson’s disease: a systematic review and  
233 network meta-analysis. *Cochrane Database of Systematic Reviews.* 2023;2023.  
234 doi:10.1002/14651858.CD013856.pub2  
235
- 236 5. Cheng-Cheng Wu, Huan-Yu Xiong, Jie-Jiao Zheng, Xue-Qiang Wang. Dance  
237 movement therapy for neurodegenerative diseases: A systematic review. *Front*  
238 *Aging Neurosci.* 2022;14. doi:10.3389/fnagi.2022.975711  
239
- 240 6. Lopez-Nieves I, Jakobsche CE. Biomolecular Effects of Dance and  
241 Dance/Movement Therapy: A Review. *Am J Dance Ther.* 2022;44: 241–263.  
242 doi:10.1007/s10465-022-09368-z  
243
- 244 7. Burzynska AZ, Finc K, Taylor BK, Knecht AM, Kramer AF. The dancing brain:  
245 Structural and functional signatures of expert dance training. *Front Hum*  
246 *Neurosci.* 2017;11. doi:10.3389/fnhum.2017.00566  
247
- 248 8. Smyth N, Rossi E, Wood C. Effectiveness of stress-relieving strategies in  
249 regulating patterns of cortisol secretion and promoting brain health.  
250 *International Review of Neurobiology.* Academic Press Inc.; 2020. pp. 219–246.  
251 doi:10.1016/bs.irn.2020.01.003  
252
- 253 9. Teixeira-Machado L, Arida RM, de Jesus Mari J. Dance for neuroplasticity: A  
254 descriptive systematic review. *Neurosci Biobehav Rev.* 2019;96: 232–240.  
255 doi:10.1016/j.neubiorev.2018.12.010  
256
- 257 10. dos Santos Duarte J, Alcantara WA, Brito JS, Barbosa LCS, Machado IPR, Furtado  
258 VKT, et al. Physical activity based on dance movements as complementary  
259 therapy for Parkinson’s disease: Effects on movement, executive functions,  
260 depressive symptoms, and quality of life. *PLoS One.* 2023;18.  
261 doi:10.1371/journal.pone.0281204  
262

- 263 11. Amanollahi M, Jameie M, Heidari A, Rezaei N. The Dialogue Between  
264 Neuroinflammation and Adult Neurogenesis: Mechanisms Involved and  
265 Alterations in Neurological Diseases. *Molecular Neurobiology*. Springer; 2023.  
266 pp. 923–959. doi:10.1007/s12035-022-03102-z  
267
- 268 12. Mee-Inta O, Zhao ZW, Kuo YM. Physical exercise inhibits inflammation and  
269 microglial activation. *Cells*. 2019;8. doi:10.3390/cells8070691  
270
- 271 13. Deng Q, Zhou X, Chen J, Pan M, Gao H, Zhou J, et al. Lower hemoglobin levels in  
272 patients with parkinson’s disease are associated with disease severity and iron  
273 metabolism. *Brain Res*. 2017;1655: 145–151.  
274 doi:10.1016/j.brainres.2016.11.007  
275
- 276 14. Filar-Mierzwa K, Marchewka A, Dąbrowski Z, Bac A, Marchewka J. Effects of  
277 dance movement therapy on the rheological properties of blood in elderly  
278 women. *Clin Hemorheol Microcirc*. 2019;72: 211–219. doi:10.3233/CH-180470  
279



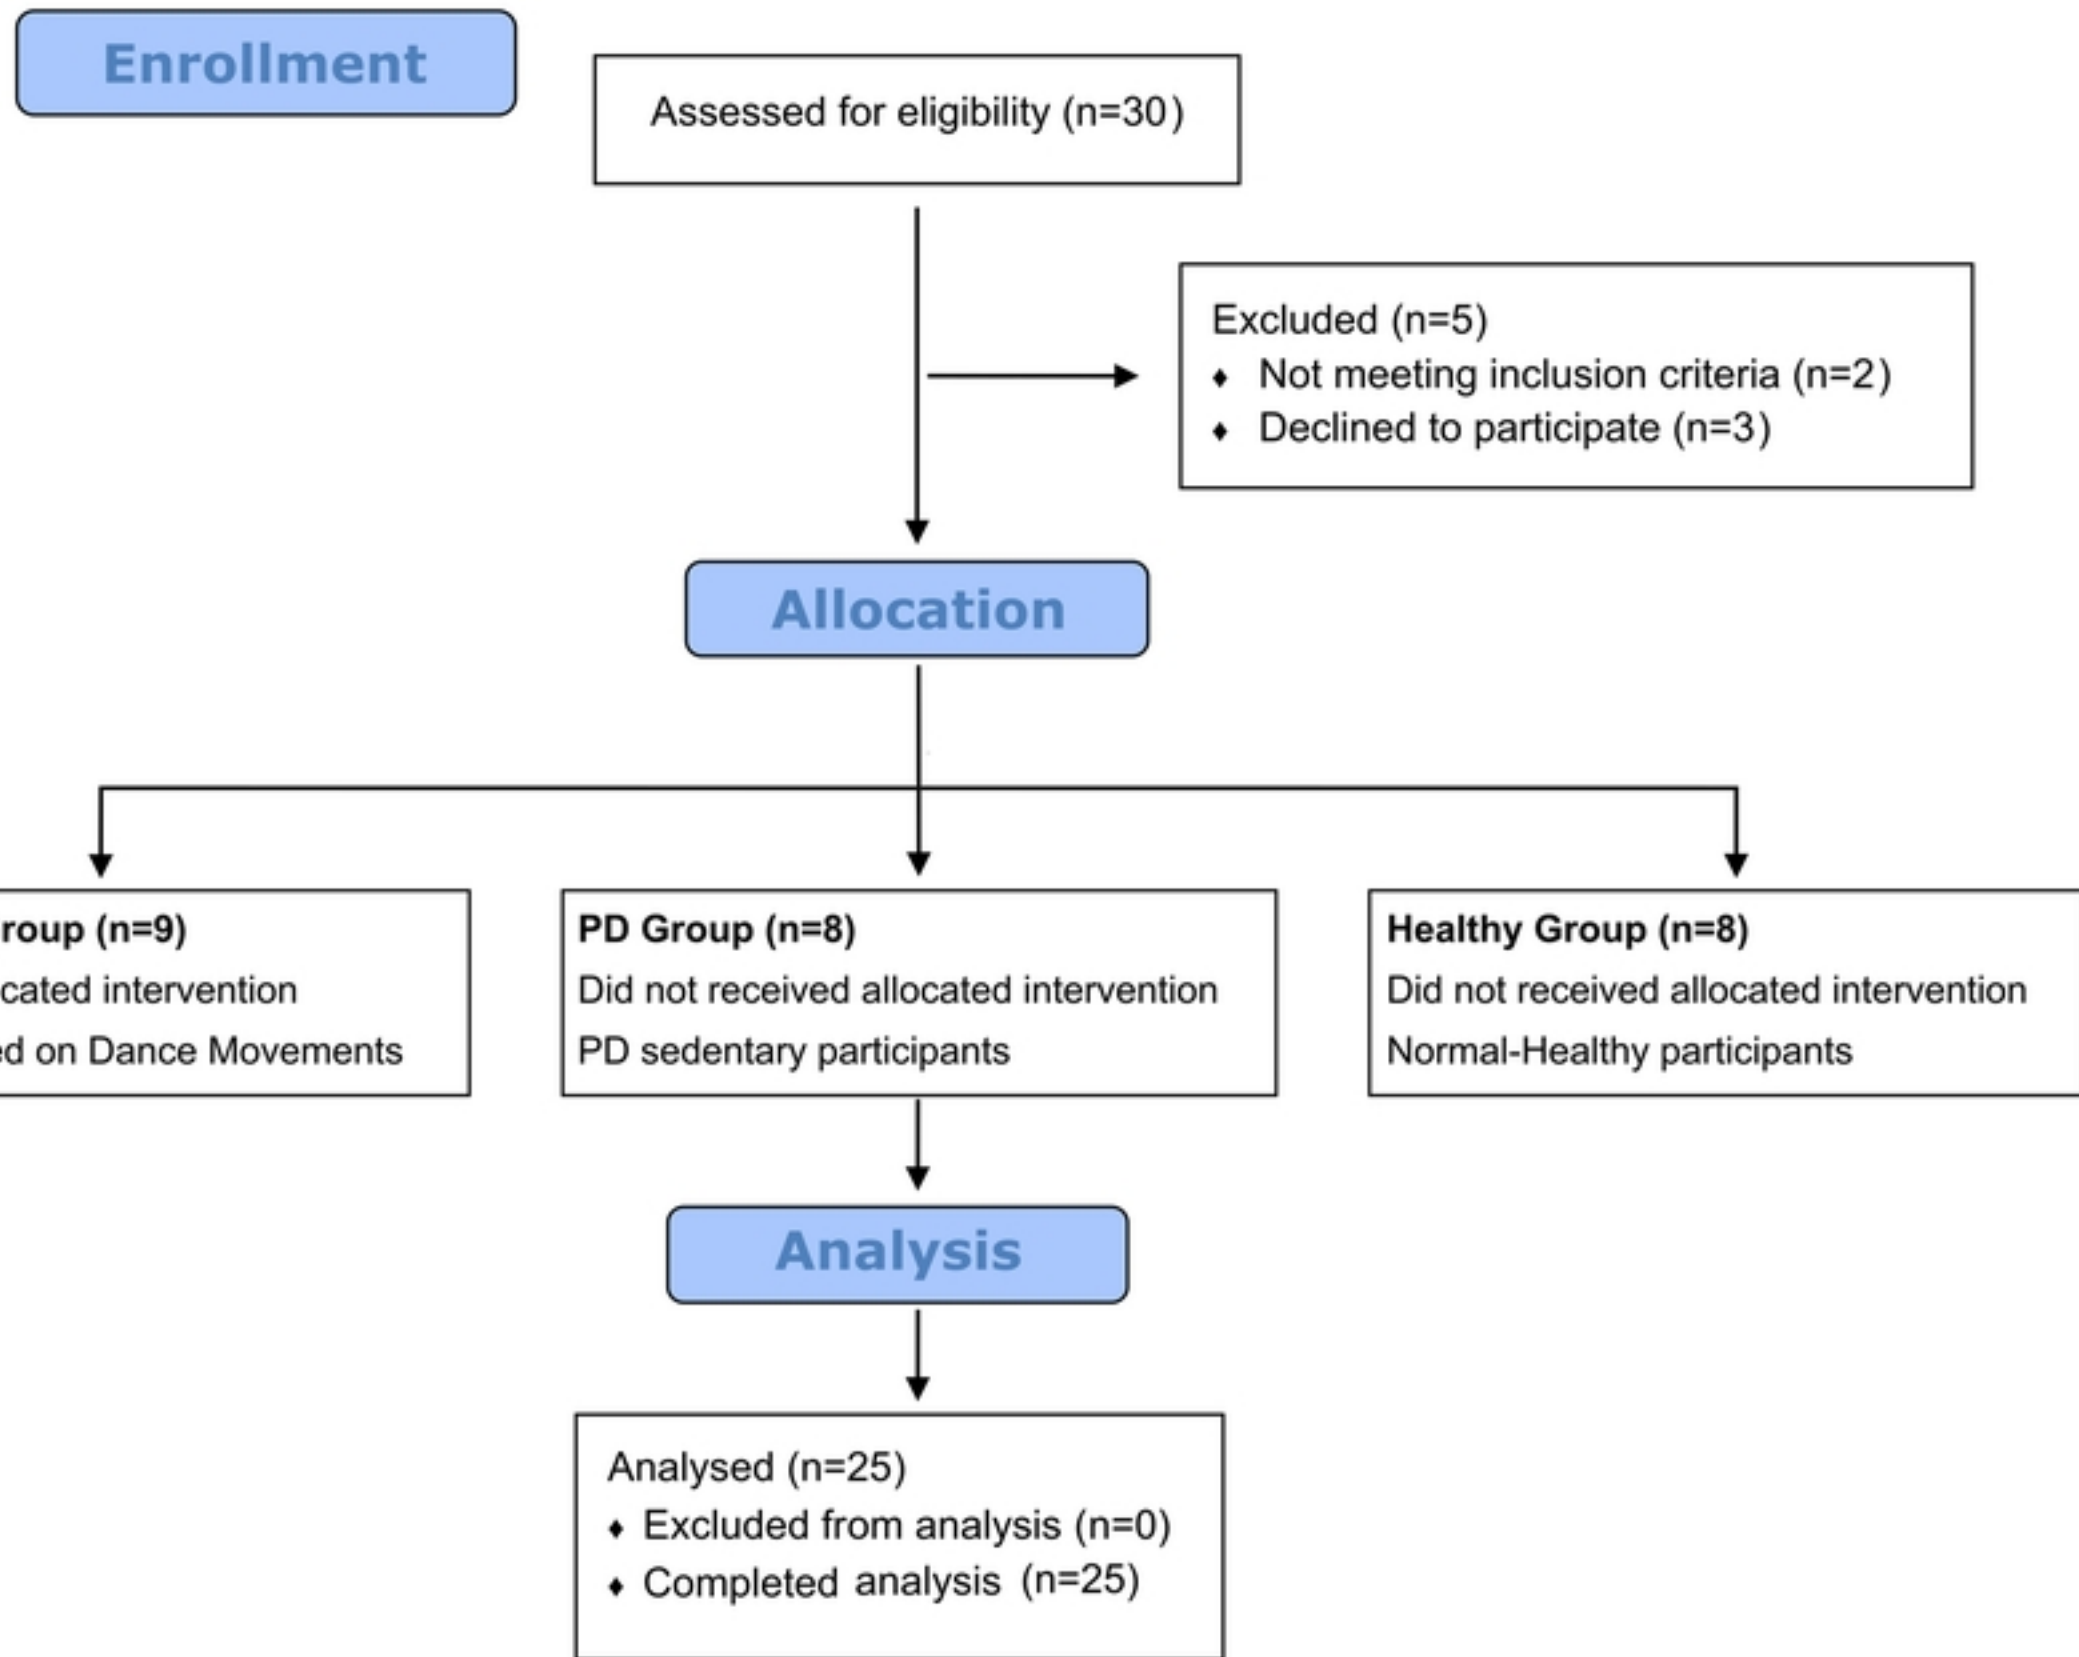

Figure 1

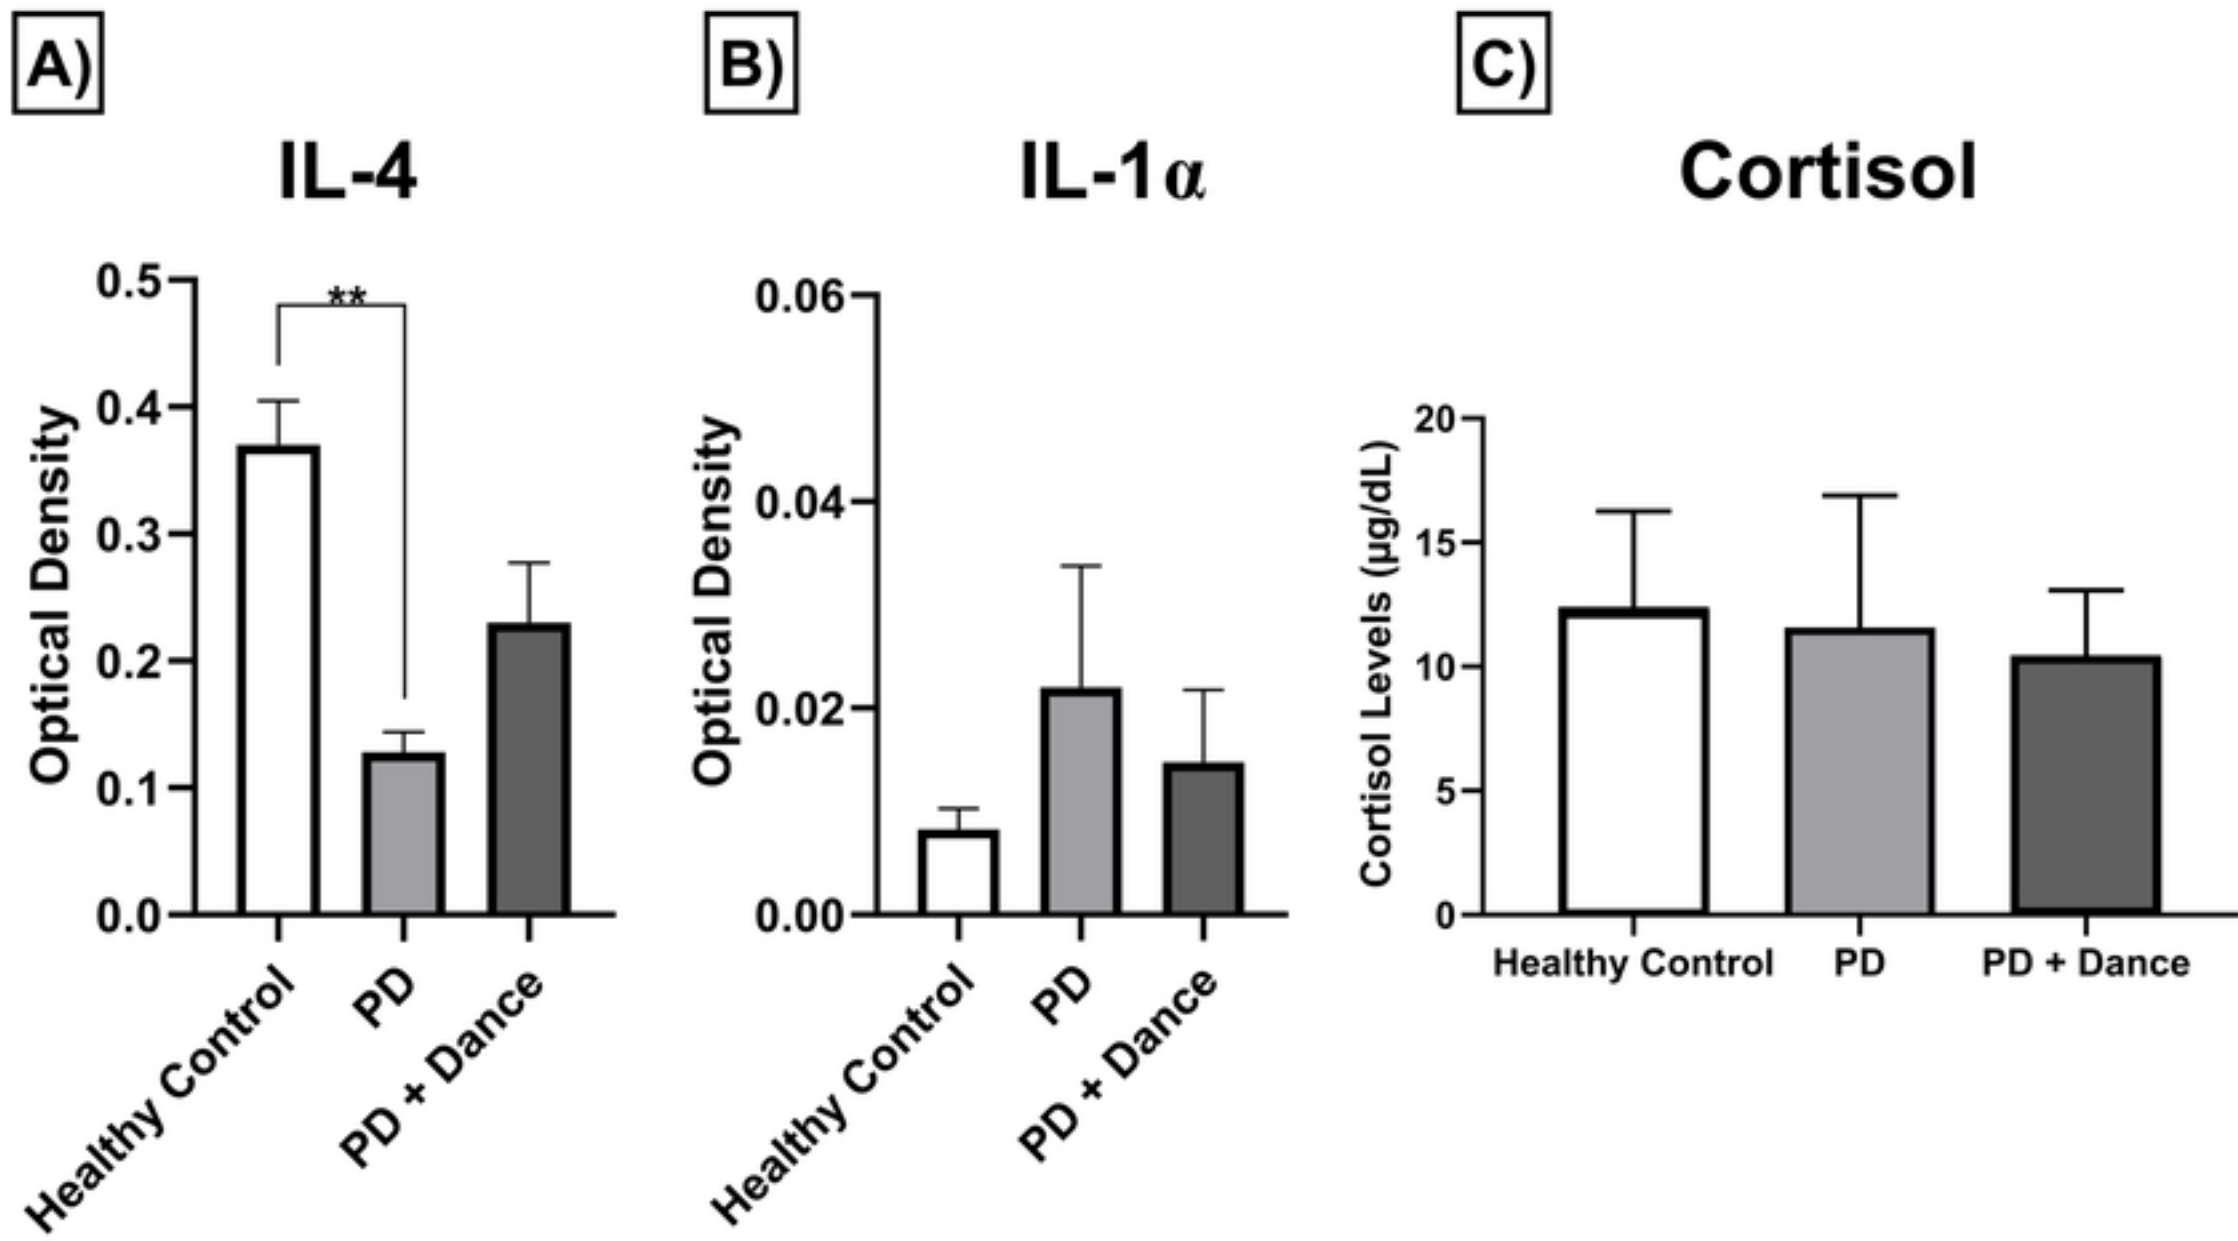

Figure 2
